# Supplementary material
Source: Springer Nature journal article supplement (https://www.springermedizin.de/resource/supplementary/13231_2013_83_MOESM3_ESM.pdf/9676490)
Supplement: MOESM3 [file 9676490]

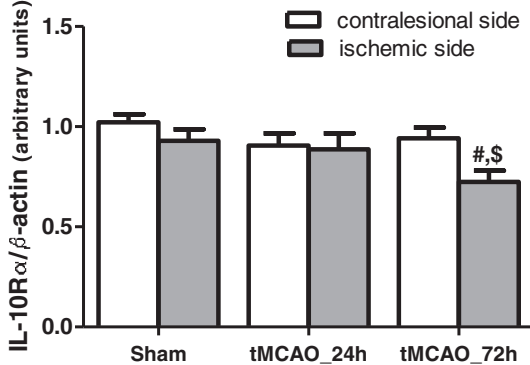

□ contralesional side  
■ ischemic side

IL-10R $\alpha$ / $\beta$ -actin (arbitrary units)

1.5  
1.0  
0.5  
0.0

Sham

tMCAO\_24h

tMCAO\_72h

#, \$

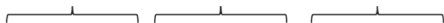

IL-10R $\alpha$  (100 kDa)

$\beta$ -actin
